# Supplementary material for: Identification and validation of a cancer-associated fibroblasts-related scoring system to predict prognosis and immune landscape in hepatocellular carcinoma through integrated analysis of single-cell and bulk RNA-sequencing
Source: publisher site journal article supplement (doi:10.18632/aging.205099), 2023-10-18
Supplement: Supplementary file [file aging-v15i20-205099-supplementary-material-SD1.pdf]

## SUPPLEMENTARY FIGURES

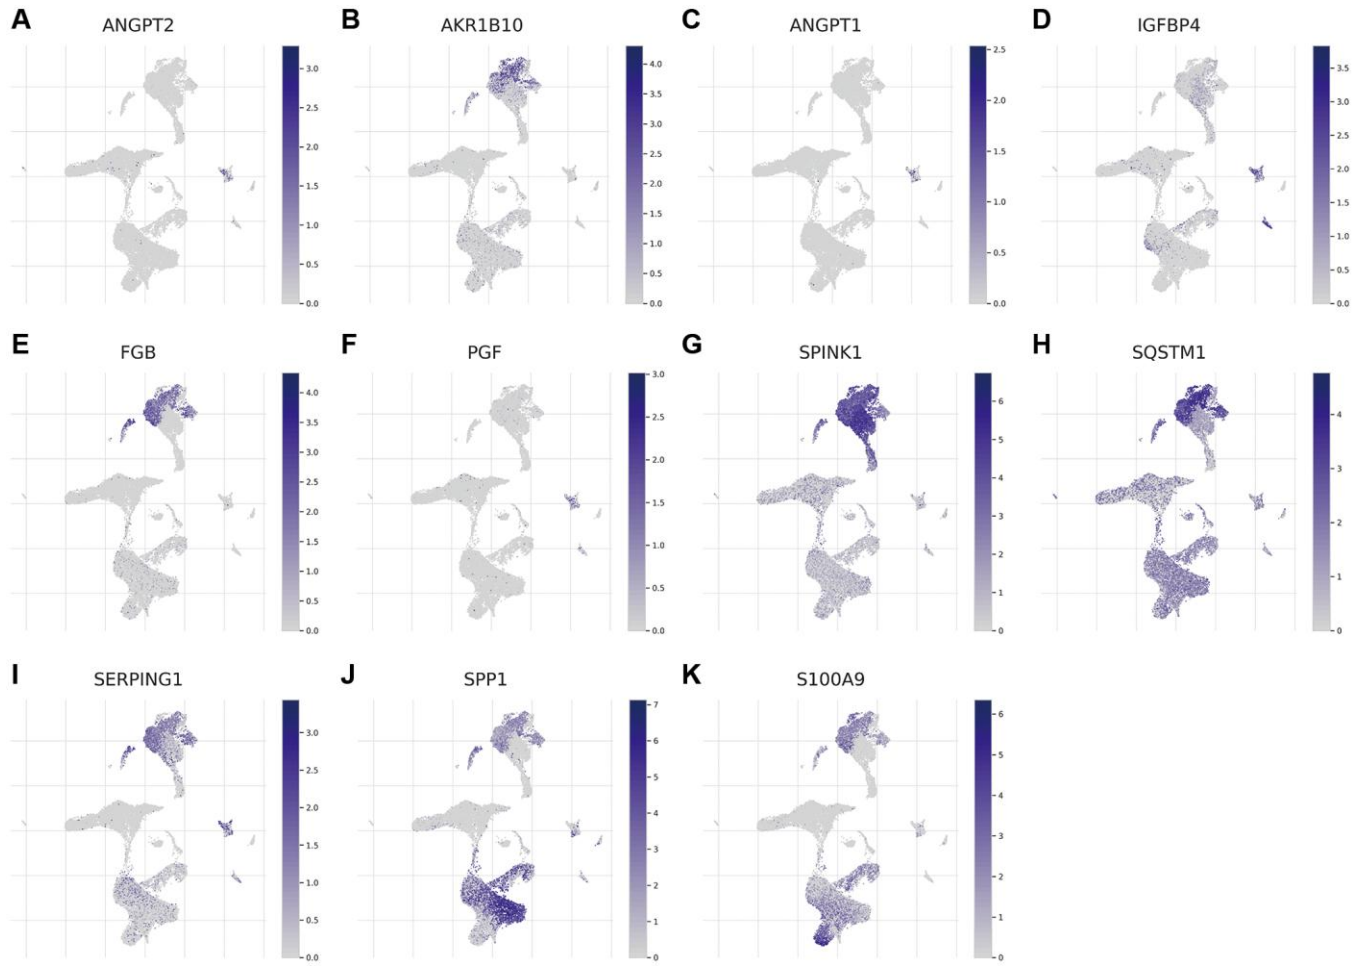

**Supplementary Figure 1. Single-cell sequencing analysis of CAF-RSS-related genes.** (A–K) The expression of the 11 scoring system-related genes in the different cell types of HCC tissue.

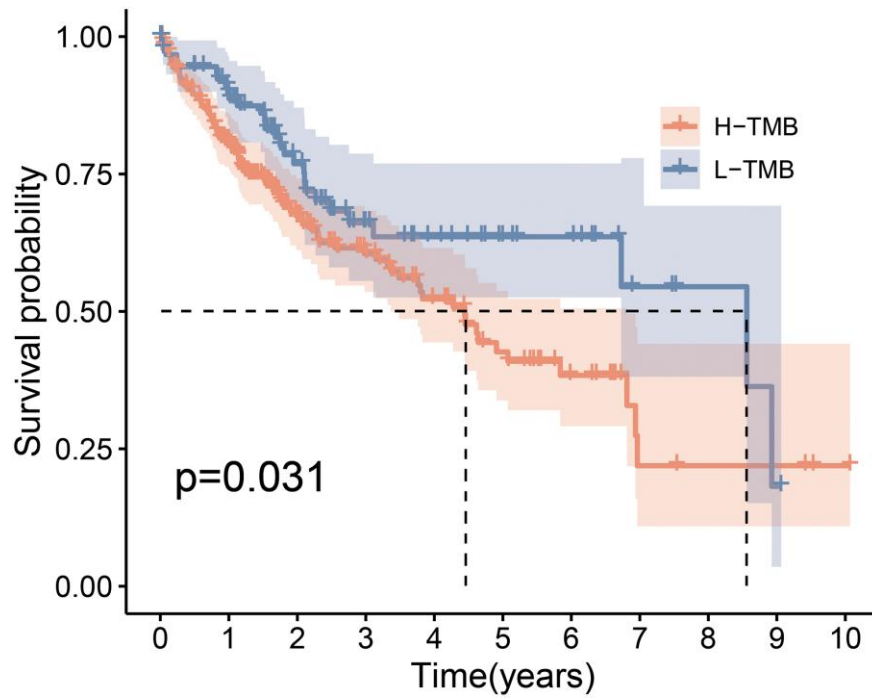

Supplementary Figure 2. Kaplan Meier curves of the high- and low-TMB groups in the TCGA-LIHC cohort.

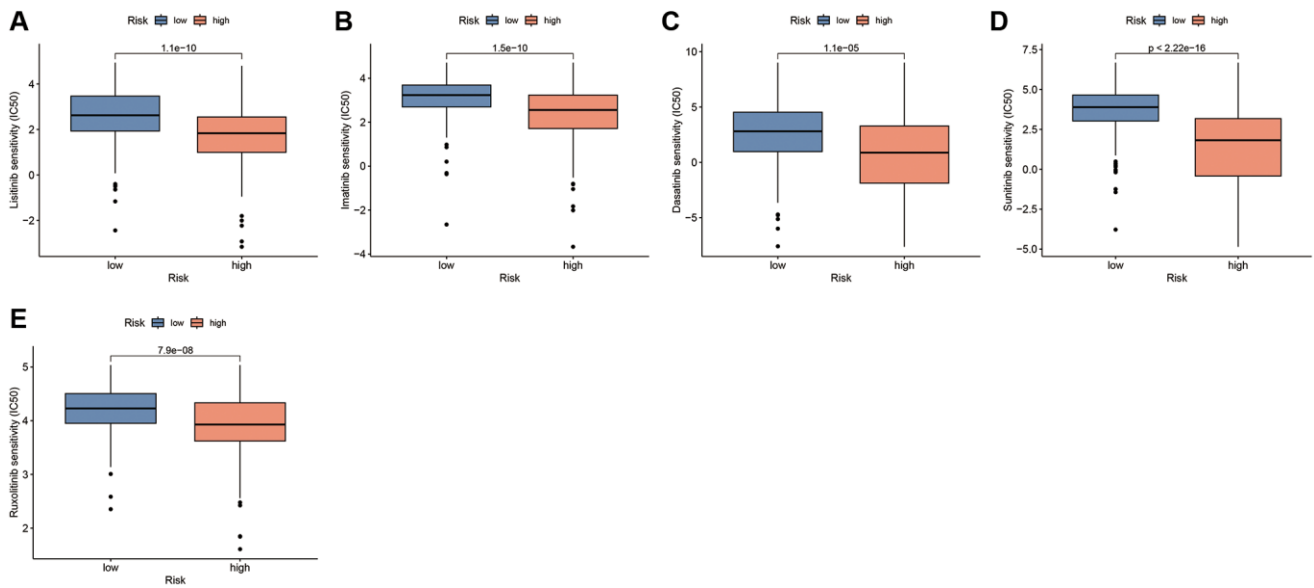

Supplementary Figure 3. Drug sensitivity analysis based on the CAFRs. (A-E) Box plots display the targeted drugs with different IC50 values between the risk groups.
