# Supplementary material for: Identification and validation of a cancer-associated fibroblasts-related scoring system to predict prognosis and immune landscape in hepatocellular carcinoma through integrated analysis of single-cell and bulk RNA-sequencing
Source: publisher site journal article supplement (doi:10.18632/aging.205099), 2023-10-18
Supplement: Supplementary file [file aging-v15i20-205099-supplementary-material-SD2.pdf]

## SUPPLEMENTARY TABLE

Supplementary Table 1. IHC staining images of proteins encoded by CAFRss-related genes in HPA.

| <b>CAFRss-related genes</b> | <b>Human protein atlas</b>                                                                                                                                              |
|-----------------------------|-------------------------------------------------------------------------------------------------------------------------------------------------------------------------|
| <i>ANGPT1</i>               | <a href="https://www.proteinatlas.org/ENSG00000154188-ANGPT1/pathology/liver+cancer">https://www.proteinatlas.org/ENSG00000154188-ANGPT1/pathology/liver+cancer</a>     |
| <i>IGFBP4</i>               | <a href="https://www.proteinatlas.org/ENSG00000141753-IGFBP4/pathology/liver+cancer">https://www.proteinatlas.org/ENSG00000141753-IGFBP4/pathology/liver+cancer</a>     |
| <i>S100A9</i>               | <a href="https://www.proteinatlas.org/ENSG00000163220-S100A9/pathology/liver+cancer">https://www.proteinatlas.org/ENSG00000163220-S100A9/pathology/liver+cancer</a>     |
| <i>SERPING1</i>             | <a href="https://www.proteinatlas.org/ENSG00000149131-SERPING1/pathology/liver+cancer">https://www.proteinatlas.org/ENSG00000149131-SERPING1/pathology/liver+cancer</a> |
| <i>ANGPT2</i>               | <a href="https://www.proteinatlas.org/ENSG00000091879-ANGPT2/pathology/liver+cancer">https://www.proteinatlas.org/ENSG00000091879-ANGPT2/pathology/liver+cancer</a>     |
| <i>SQSTM1</i>               | <a href="https://www.proteinatlas.org/ENSG00000161011-SQSTM1/pathology/liver+cancer">https://www.proteinatlas.org/ENSG00000161011-SQSTM1/pathology/liver+cancer</a>     |
| <i>SPINK1</i>               | <a href="https://www.proteinatlas.org/ENSG00000164266-SPINK1/pathology/liver+cancer">https://www.proteinatlas.org/ENSG00000164266-SPINK1/pathology/liver+cancer</a>     |
| <i>FGB</i>                  | <a href="https://www.proteinatlas.org/ENSG00000171564-FGB/pathology/liver+cancer">https://www.proteinatlas.org/ENSG00000171564-FGB/pathology/liver+cancer</a>           |
| <i>SPP1</i>                 | <a href="https://www.proteinatlas.org/ENSG00000118785-SPP1/pathology/liver+cancer">https://www.proteinatlas.org/ENSG00000118785-SPP1/pathology/liver+cancer</a>         |
| <i>AKR1B10</i>              | <a href="https://www.proteinatlas.org/ENSG00000198074-AKR1B10/pathology/liver+cancer">https://www.proteinatlas.org/ENSG00000198074-AKR1B10/pathology/liver+cancer</a>   |
